# Supplementary material for: Identification of Novel Inhibitors against Coactivator Associated Arginine Methyltransferase 1 Based on Virtual Screening and Biological Assays
Source: Hindawi journal article supplement (doi:10.1155/2016/7086390), 2016-01-01
Supplement: f1 [file 7086390.f1.pdf]

# Identification of Novel Inhibitors against Co-activator Associated Arginine Methyltransferase 1 (CARM1) Based on Virtual Screening and Biological Assays

Fei Ye<sup>a,b,†,\*</sup>, Weiyao Zhang<sup>a,†</sup>, Wenchao Lu<sup>c,d</sup>, Yiqian Xie<sup>c</sup>, Hao Jiang<sup>c,d</sup>, Jia Jin<sup>a,\*</sup>, Cheng Luo<sup>c</sup>

<sup>a</sup>Zhejiang Sci-Tech University, College of Life Sciences, Hangzhou, China

<sup>b</sup>Key Laboratory of Plant Secondary Metabolism and Regulation of Zhejiang Province

<sup>c</sup>Drug Discovery and Design Center, State Key Laboratory of Drug Research, Shanghai Institute of Materia Medica, Chinese Academy of Sciences, China

<sup>d</sup>University of Chinese Academy of Sciences, Beijing, China

\*Corresponding author:

Tel: +86 571 86843811; E-mail address: yefei@zstu.edu.cn (Fei Ye).

Tel: +86 571 86843199; E-mail address: aukaukau@163.com (Jia Jin).

†These authors contributed equally

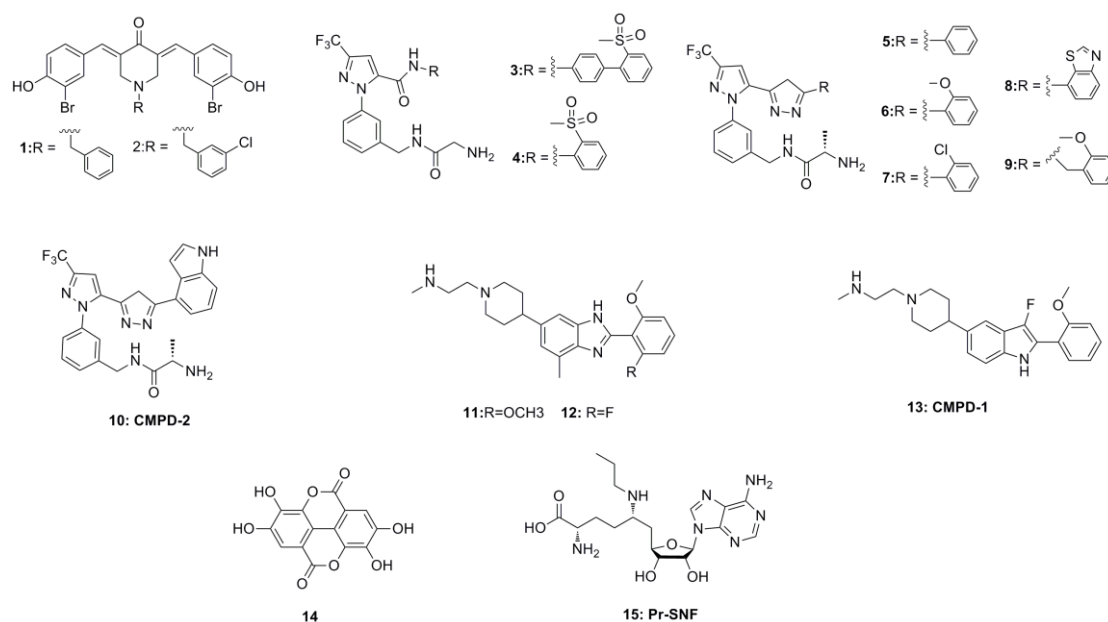

Figure S1. The chemical structures of typical reported inhibitors targeting CARM1.

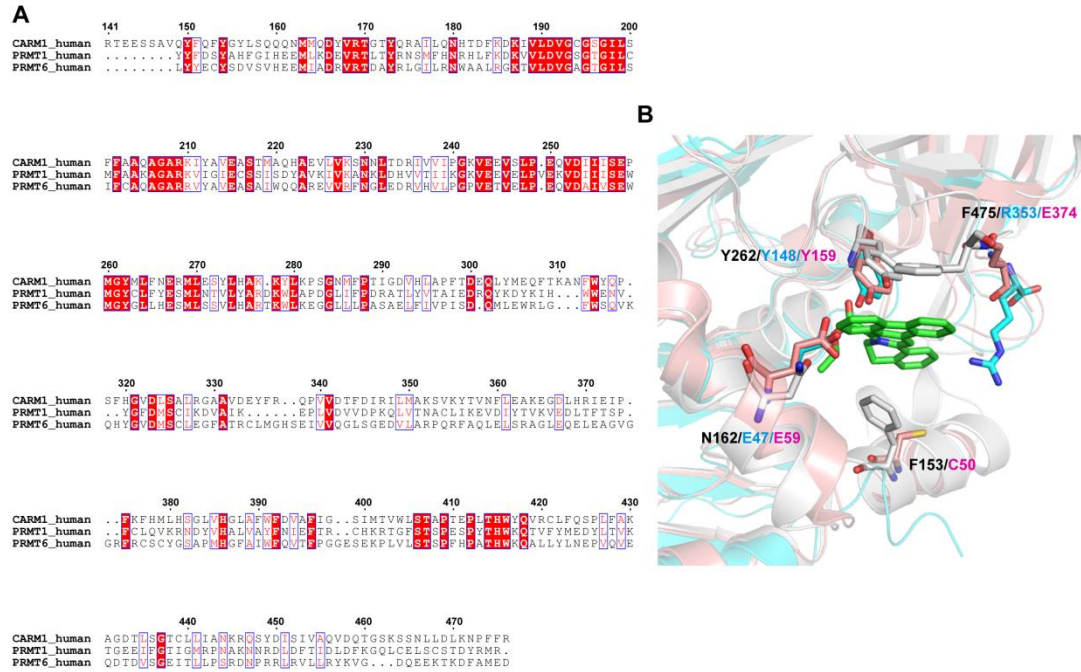

Figure S2. The molecular basis for selectivity of compound CA\_C11 and CA\_C11.

(A) Sequence alignment of CARM1 (human), PRMT1 (human), and PRMT6

(human). (B) Structural superimposition of active sites of CARM1, PRMT1 and

PRMT6. CARM1 (PDB ID code: 2Y1W), PRMT1 (IORH) and PRMT6 (5E8R) are colored grey, cyan and pink, respectively.
